# Supplementary material
Source: publisher figshare collection journal article supplement (https://acs.figshare.com/ndownloader/files/7607902)
Supplement: Supplementary file 1 [file 7607902]

Supporting Information

***Self-Assembly-Directed Aerogel and Membrane  
Formation from a Magnetic Composite: An  
Approach to Developing Multifunctional  
Materials***

*Balachandran Vivek and Edamana Prasad\**

Department of Chemistry, Indian Institute of Technology Madras (IIT M), Chennai 600 036

\*E-mail: [pre@iitm.ac.in](mailto:pre@iitm.ac.in)

### **Membrane Permeability Test**

The membrane permeation was tested by dead end filtration method, The membrane pressure was adjusted using nitrogen gas. The membrane was subjected to a stabilized flux with ultrapure water and the allowed to filter water at different pH and different pressure. The permeability were calculated using equation 1

$$J = \frac{V}{A\Delta T} \quad (1)$$

Here, J is the permeability (L/m<sup>2</sup>h), V is the permeated volume of water (L), A is the area of membrane (0.9 cm<sup>2</sup>) and T is the permeation time (min).

### **Stability of the membrane**

The stability of the membrane was calculated in terms of weight loss in different solvent by following the equation 2

$$W = [1 - \frac{W_d}{W_s}] \quad (2)$$

Where, W is the weight loss, W<sub>d</sub> and W<sub>s</sub> are the weight of dried membrane and solvent treated dried membrane.

### **Membrane swelling degree**

The dried membrane was first weighed and immersed in to an aqueous solution, at each time interval the membrane was taken out from the solution and weighed. After the membrane

reached a constant weight, membrane was wiped with tissue paper, dried and weighed. The swelling degree was calculated using the equation 3.

$$SD = \frac{W_d}{W_s} \quad (3)$$

Where SD is the swelling degree,  $W_d$  and  $W_s$  are the weight of dried membrane and swelled membrane.

### **Oil adsorption experiment**

The oil adsorption experiment was done by using engine oil. The aerogel (10 mg) was cut in to cube shape and place on the oil on water in a petri dish. At each time intervals the aerogel were taken out and weighed. The oil absorption capacity was find out by using the following equation.

$$Absorption\ capacity = \frac{W_{adsorbed} - W_{dry}}{W_{dry}} \quad (4)$$

Where,  $W_{adsorbed}$  is the weight of oil adsorbed gel and  $W_{dry}$  is the weight gel before adsorption.

### **Desalination Experiment**

The saline water was prepared by dissolving 33W% of NaCl in 1L of deionized water. The filtration experiment was done by using glass funnel and conical flask based filtration set up with membrane holder. The concentration of the salt was measured by using ICP-OES spectrometer.

$$q_e = \frac{(C_o - C_e)V}{m} \quad (5)$$

where  $C_e$  is the equilibrium concentration,  $q_e$  corresponds to adsorption amount at equilibrium,  $C_0$  is the initial concentration of salt,  $V$  and  $m$  are the volume of solution and mass of the membrane, respectively.

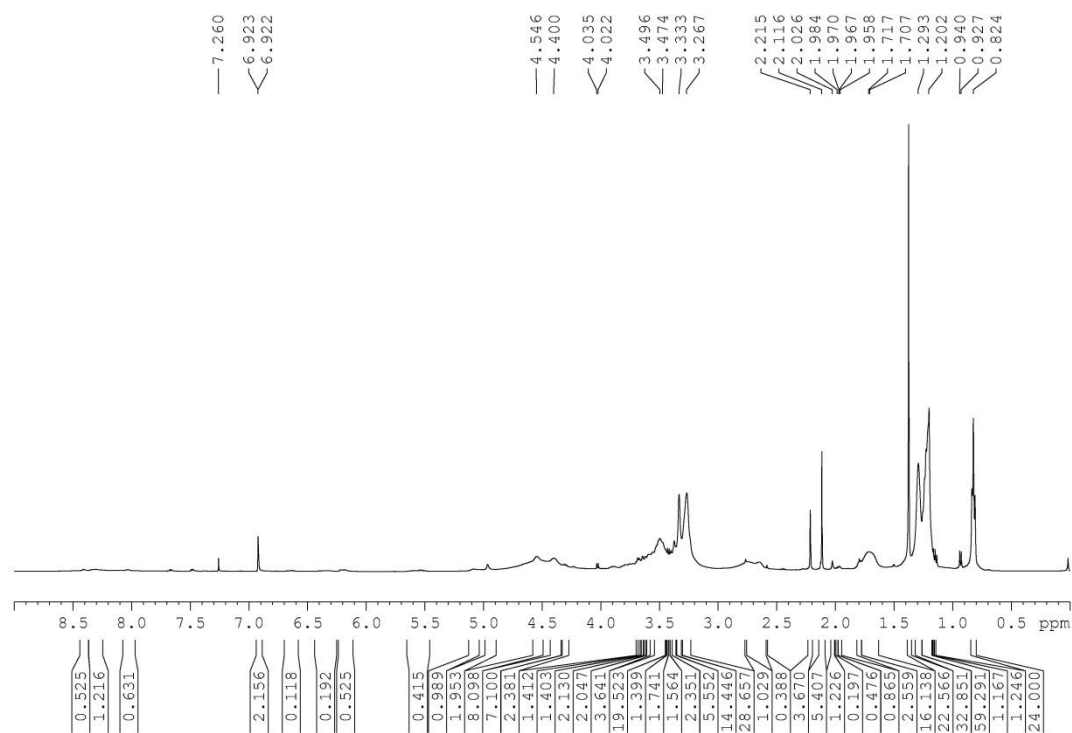

Figure S1:  $^1\text{H}$  NMR spectra of PAMAMOS in deuterated DMSO.

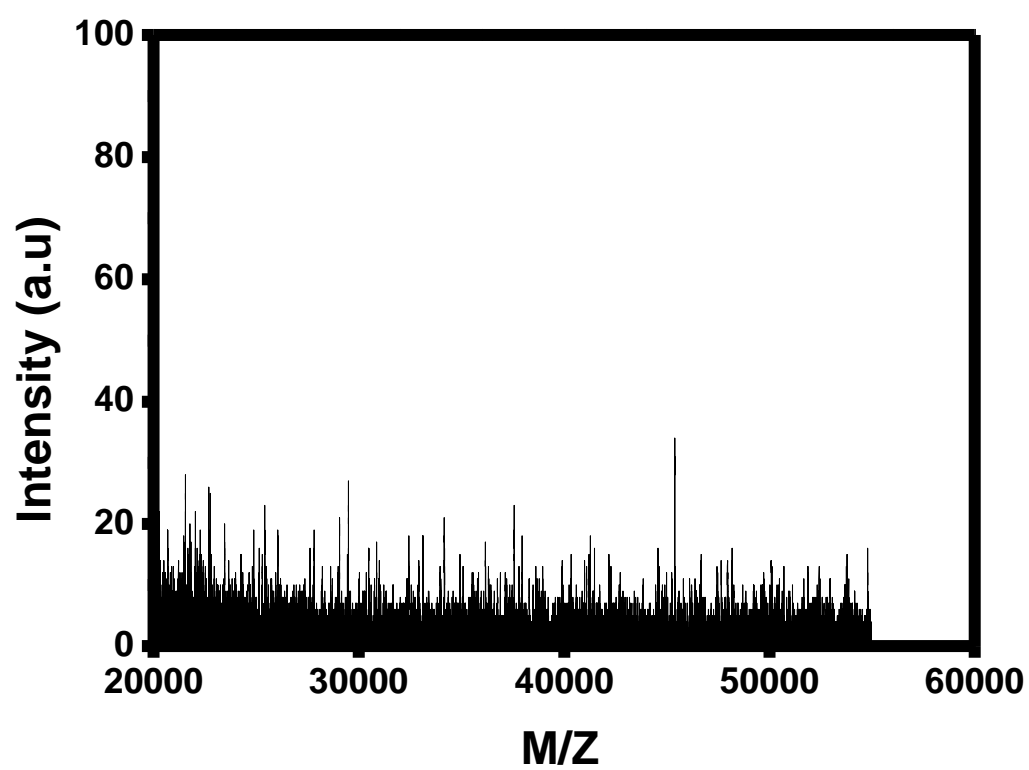

Figure S2: MALDI spectra of PAMAMOS with 2,5-dihydroxy benzoic acid as matrix.

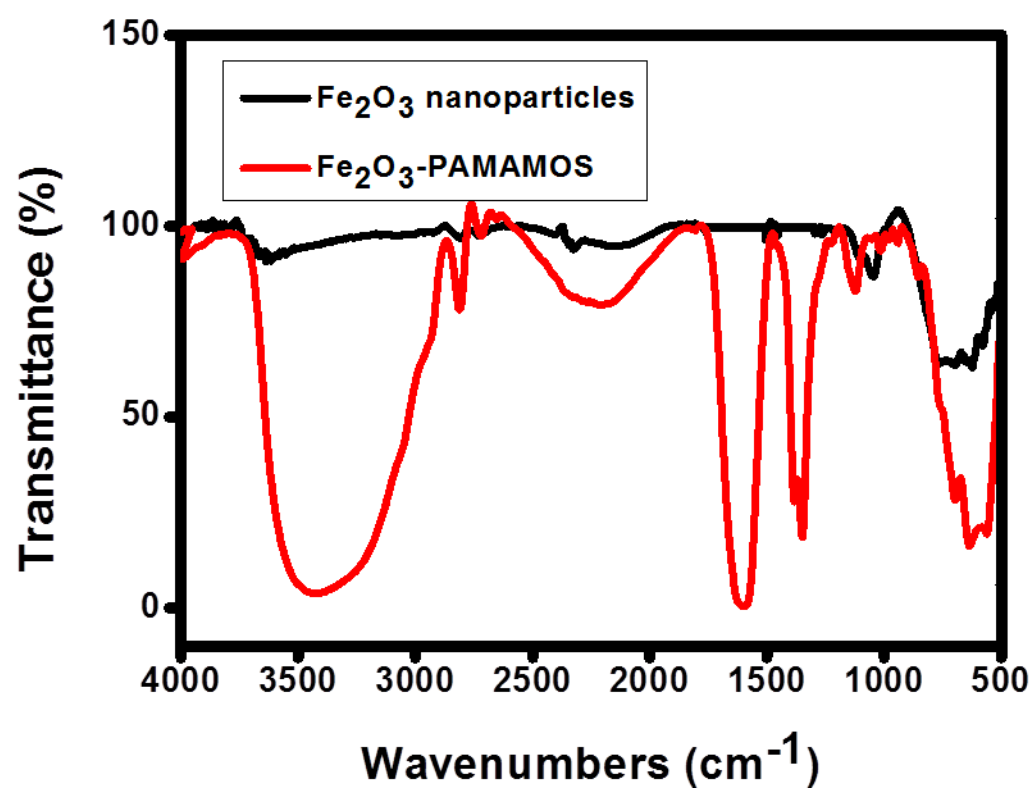

Figure S3: FT-IR spectrum of Fe<sub>2</sub>O<sub>3</sub> nanoparticles and Fe<sub>2</sub>O<sub>3</sub>-PAMAMOS.

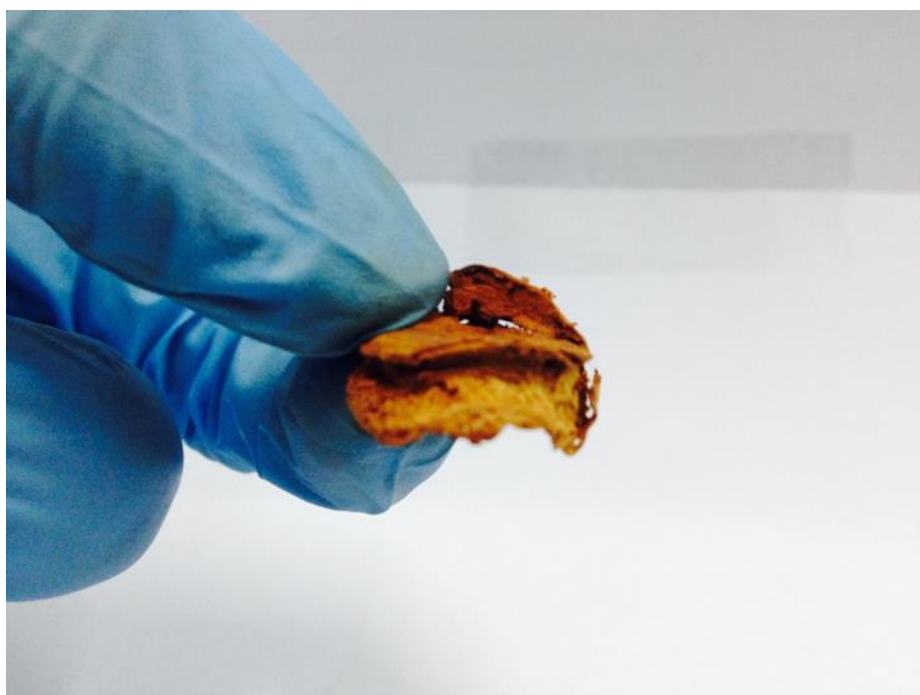

Figure S4: Photograph of aerogel.

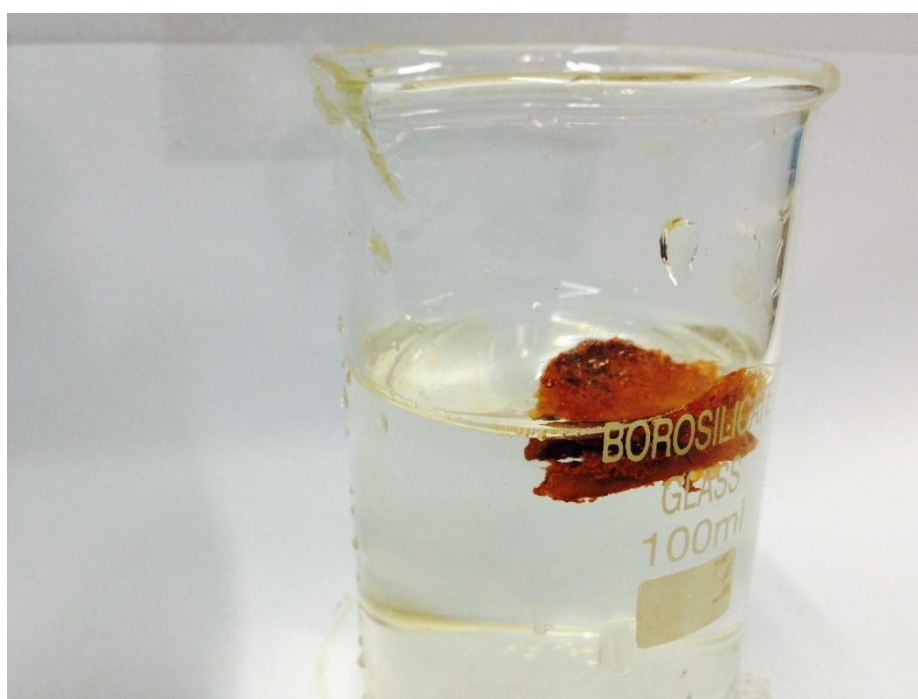

Figure S5: Photograph of floating of aerogel in water.



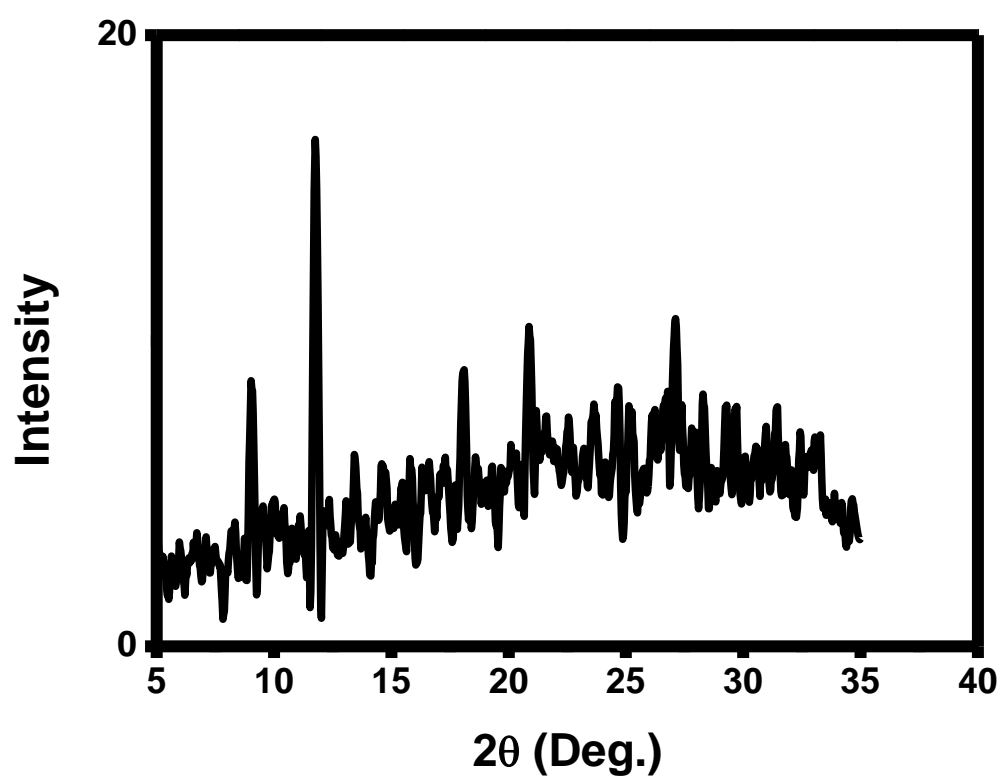

Figure S6: Powder XRD of  $\text{Fe}_2\text{O}_3$  nanoparticles.

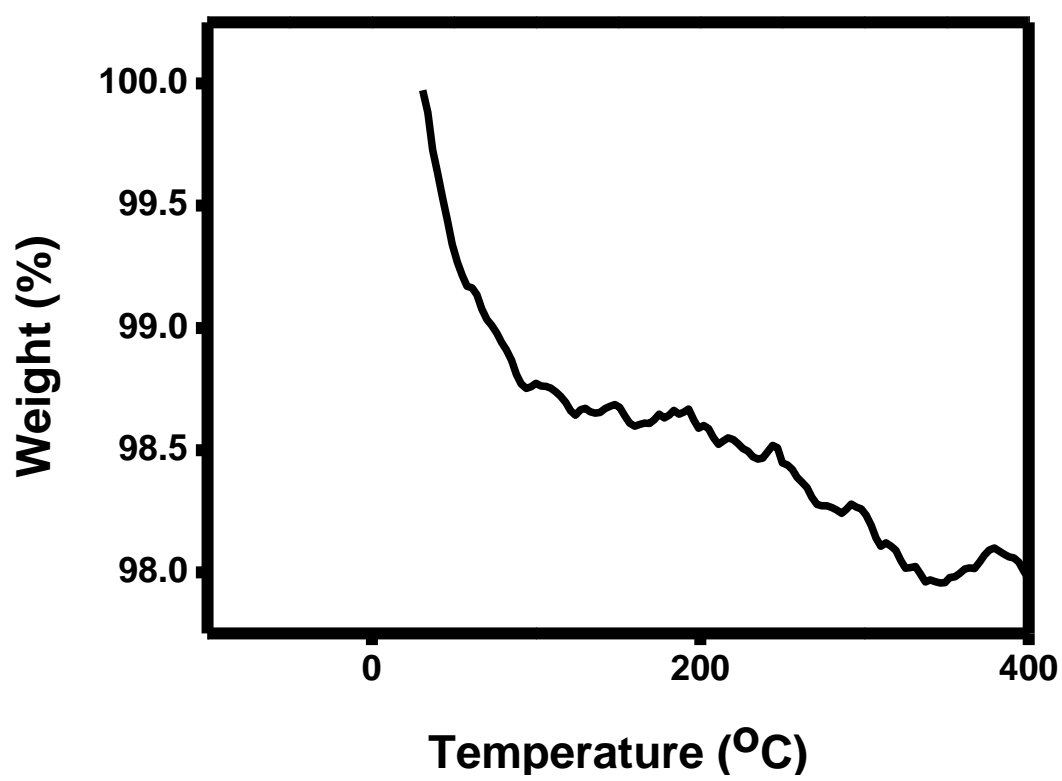

Figure S7: TGA analysis of  $\text{Fe}_2\text{O}_3$  nanoparticles.

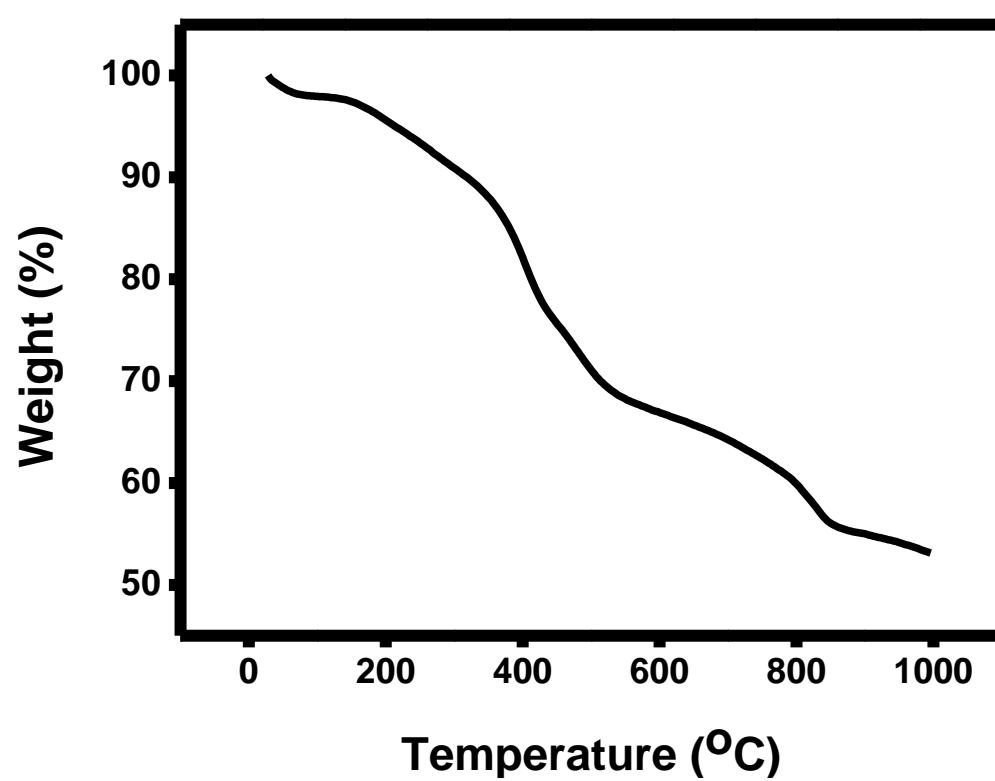

Figure S8: TGA analysis of  $\text{Fe}_2\text{O}_3$ -PAMAMOS nanoparticles.

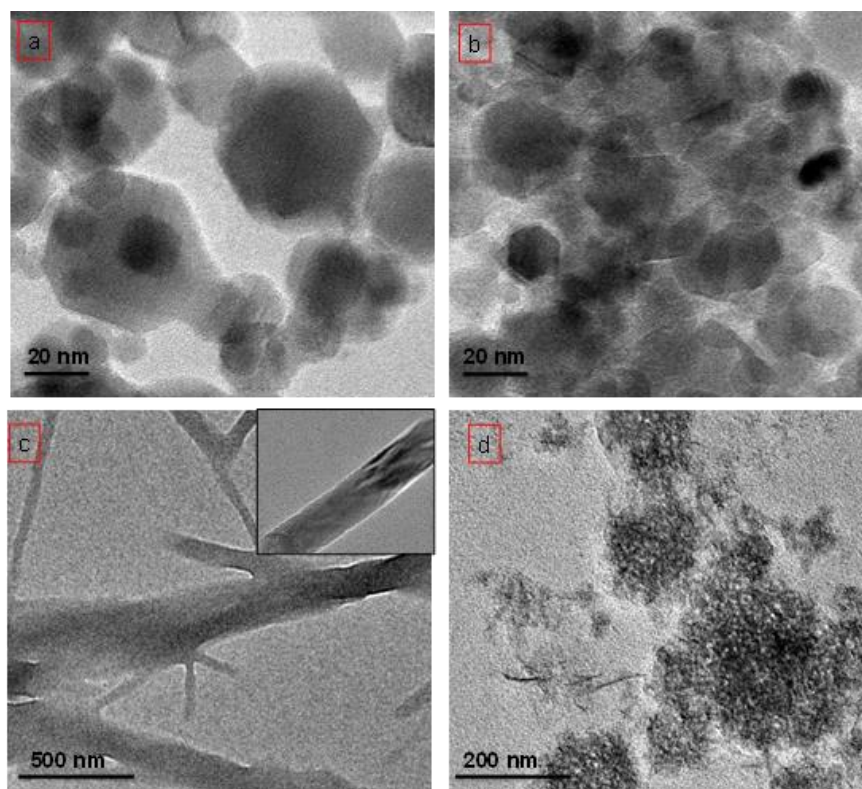

Figure S9: HR-TEM image of (a) Fe<sub>2</sub>O<sub>3</sub> nanoparticles, (b) Fe<sub>2</sub>O<sub>3</sub>-PAMAMOS nanoparticles, (c) aerogel and (d) membrane

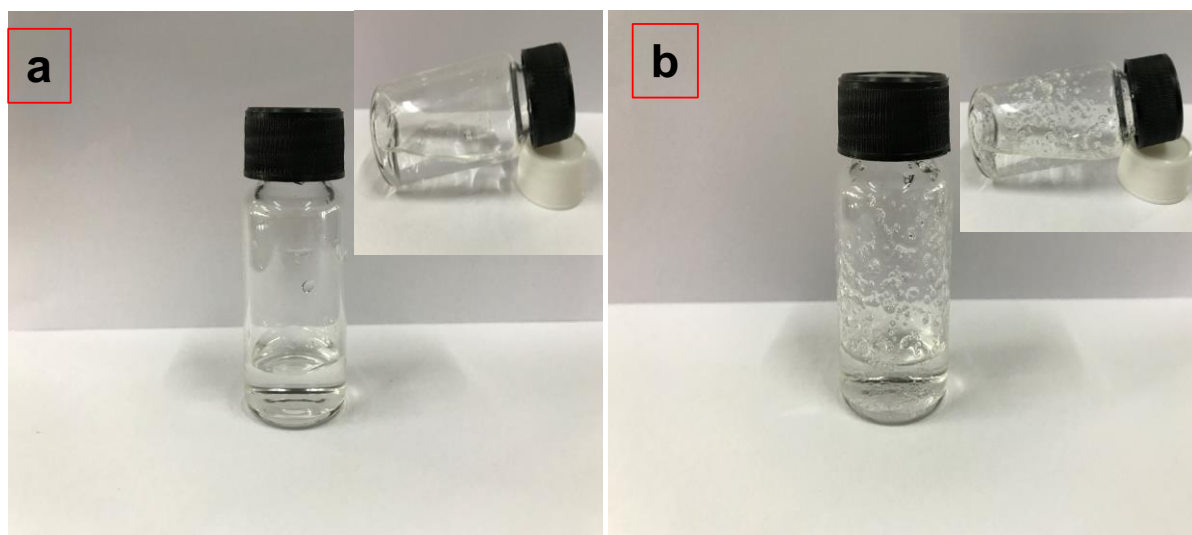

Figure S10: Photograph of control experiment; (a) PVA and formaldehyde are allowed to react in presence of HCl and H<sub>2</sub>SO<sub>4</sub> in the absence of Fe<sub>2</sub>O<sub>3</sub>-PAMAMOS, resulting in no gelation;(b) PVA and formaldehyde are reacted with PAMAMOS in the absence of Fe<sub>2</sub>O<sub>3</sub>, again, resulting no gelation.

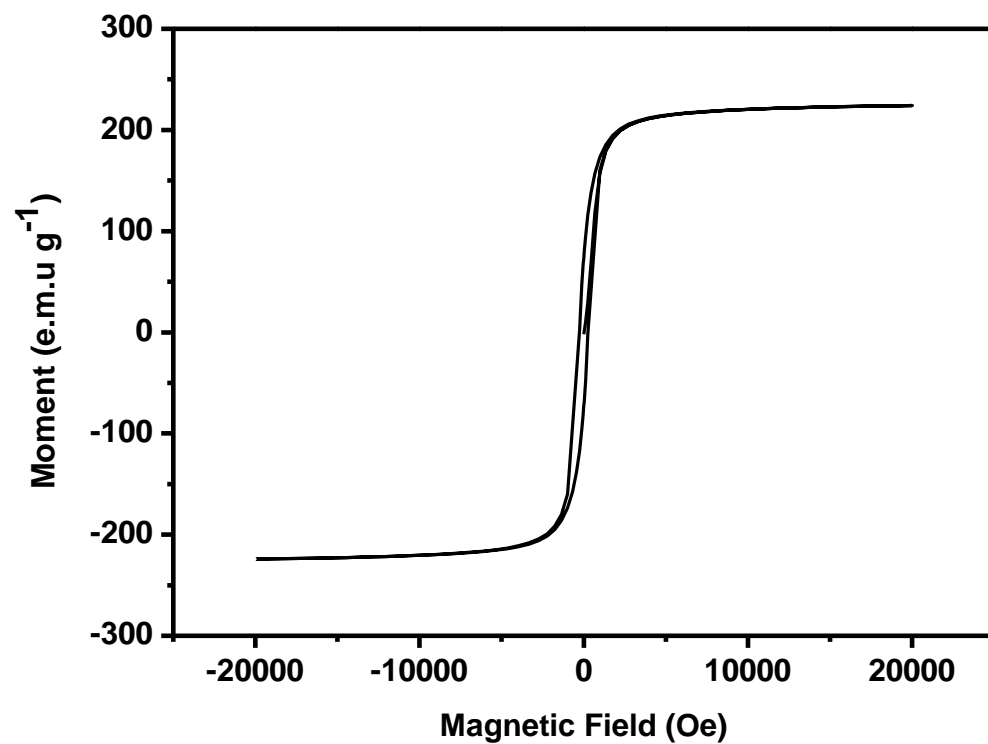

Figure S11: Magnetic moment versus magnetic field curve of Fe<sub>2</sub>O<sub>3</sub> nanoparticles at 5K.

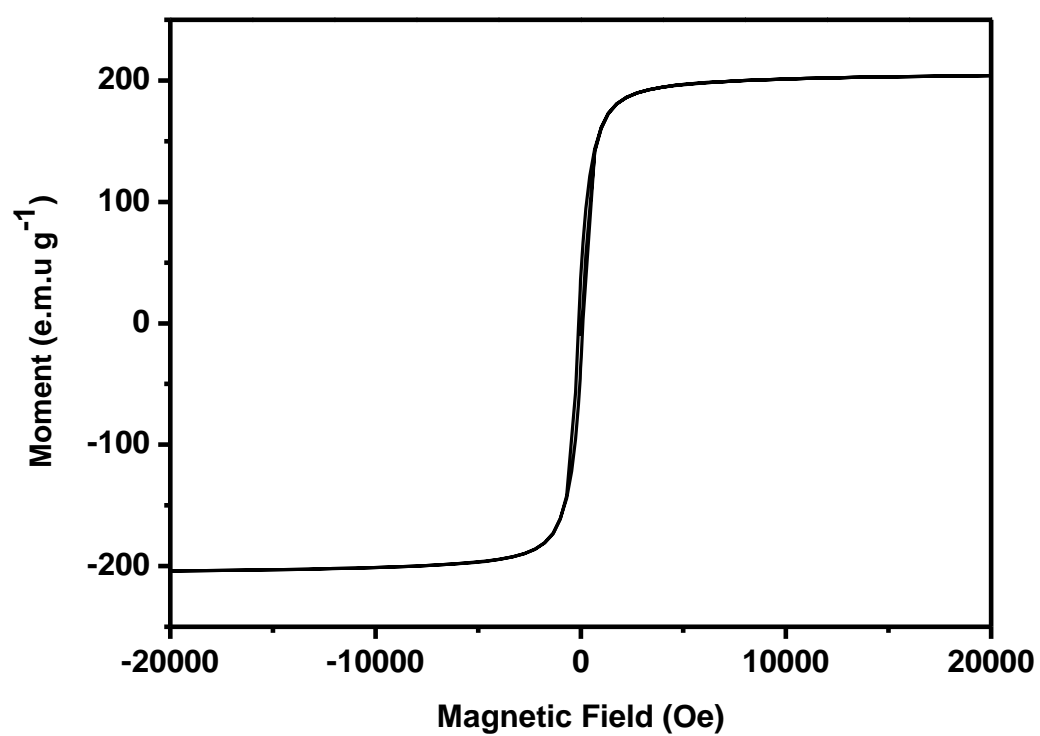

Figure S12: Magnetic moment versus magnetic field curve of Fe<sub>2</sub>O<sub>3</sub> nanoparticles at 300K.

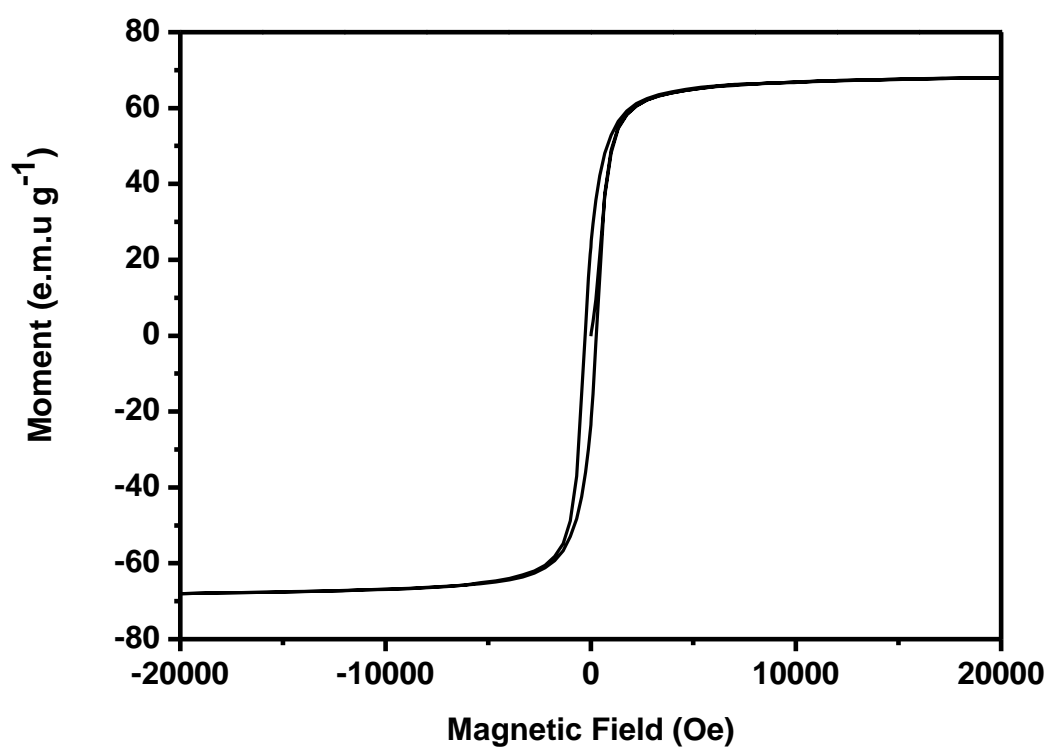

Figure S13: Magnetic moment versus magnetic field curve of Fe<sub>2</sub>O<sub>3</sub>-PAMAMOS nanoparticles at 5K.



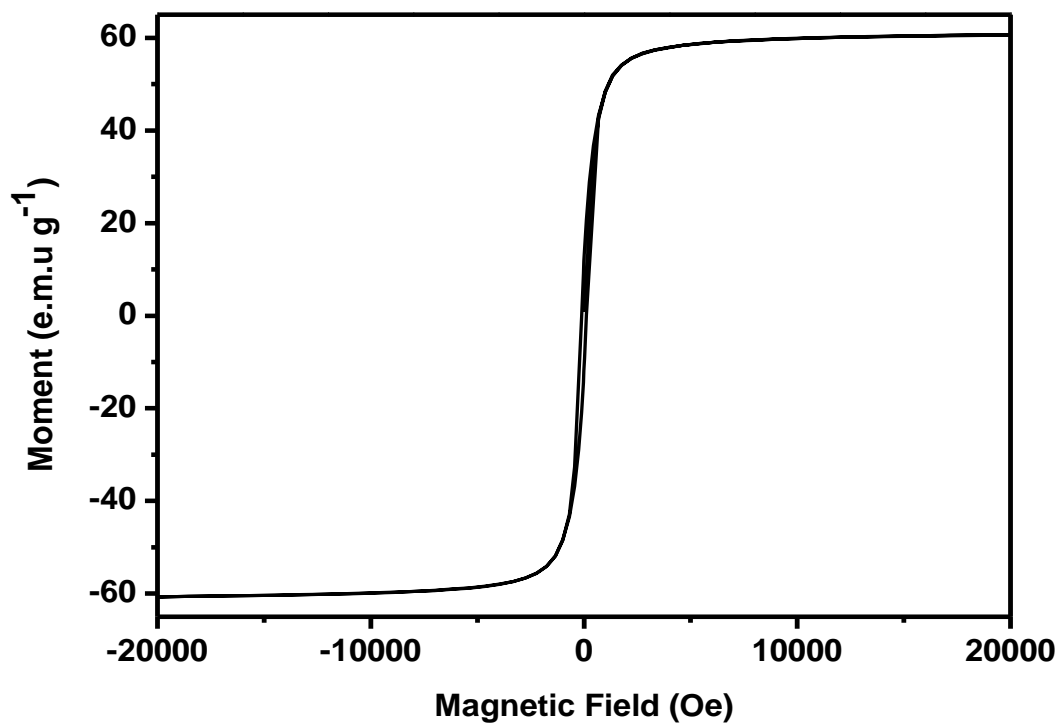

Figure S14: Magnetic moment versus magnetic field curve of Fe<sub>2</sub>O<sub>3</sub>-PAMAMOS nanoparticles at 300K.

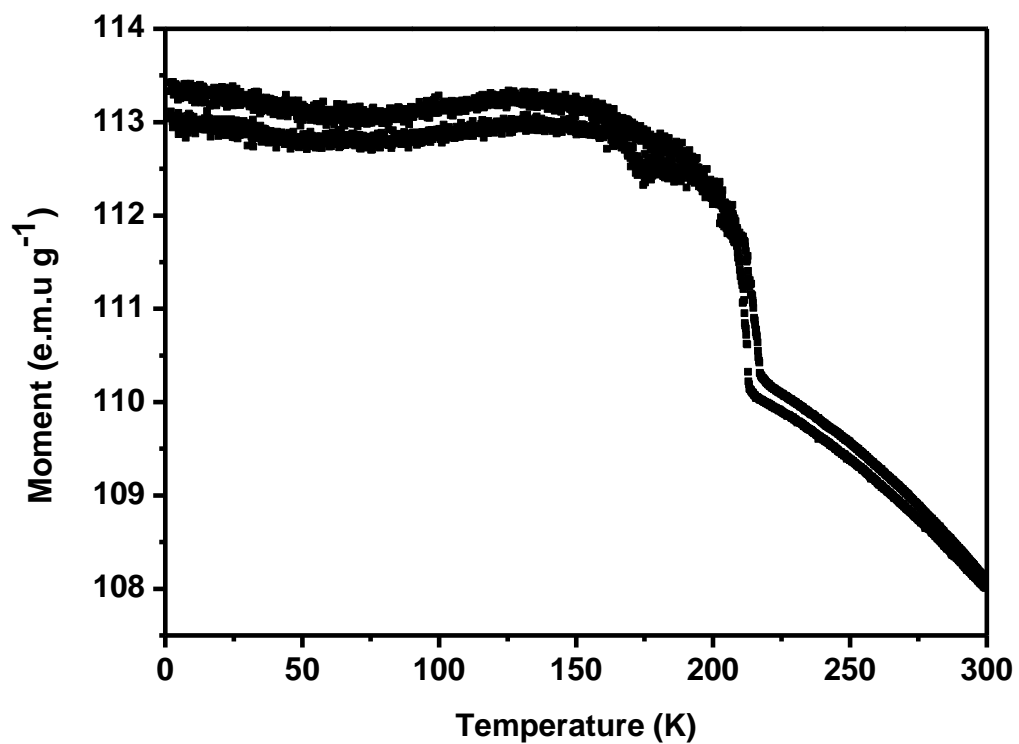

Figure S15: Magnetic moment versus temperature curve of Fe<sub>2</sub>O<sub>3</sub> nanoparticles at constant magnetic field.

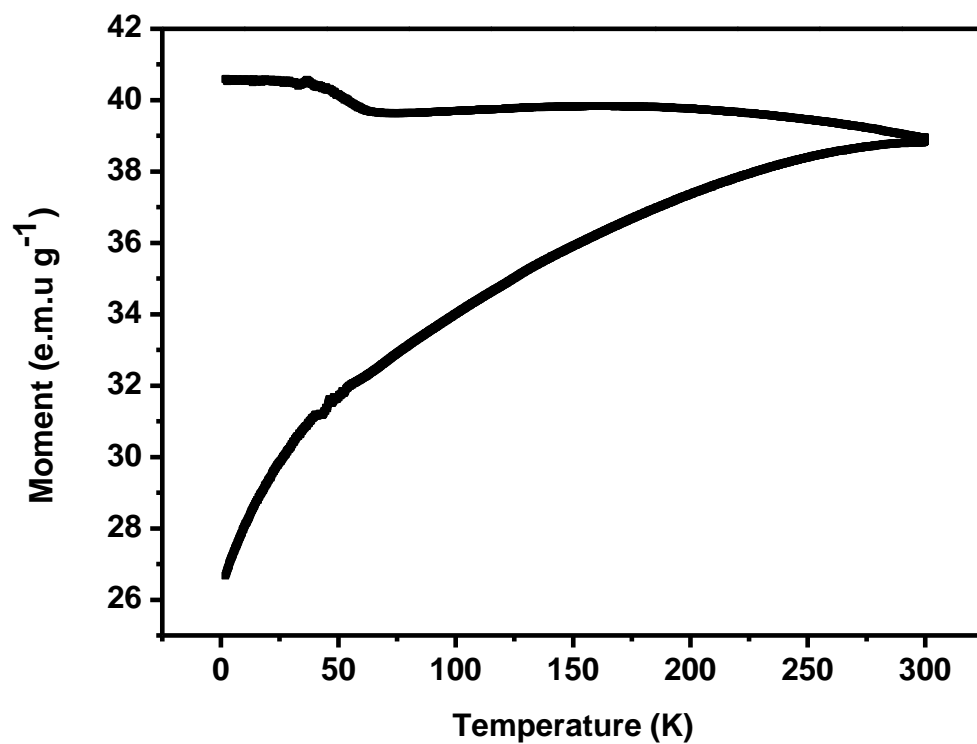

Figure S16: Magnetic moment versus temperature curve of Fe<sub>2</sub>O<sub>3</sub>–PAMAMOS nanoparticles at constant magnetic field.

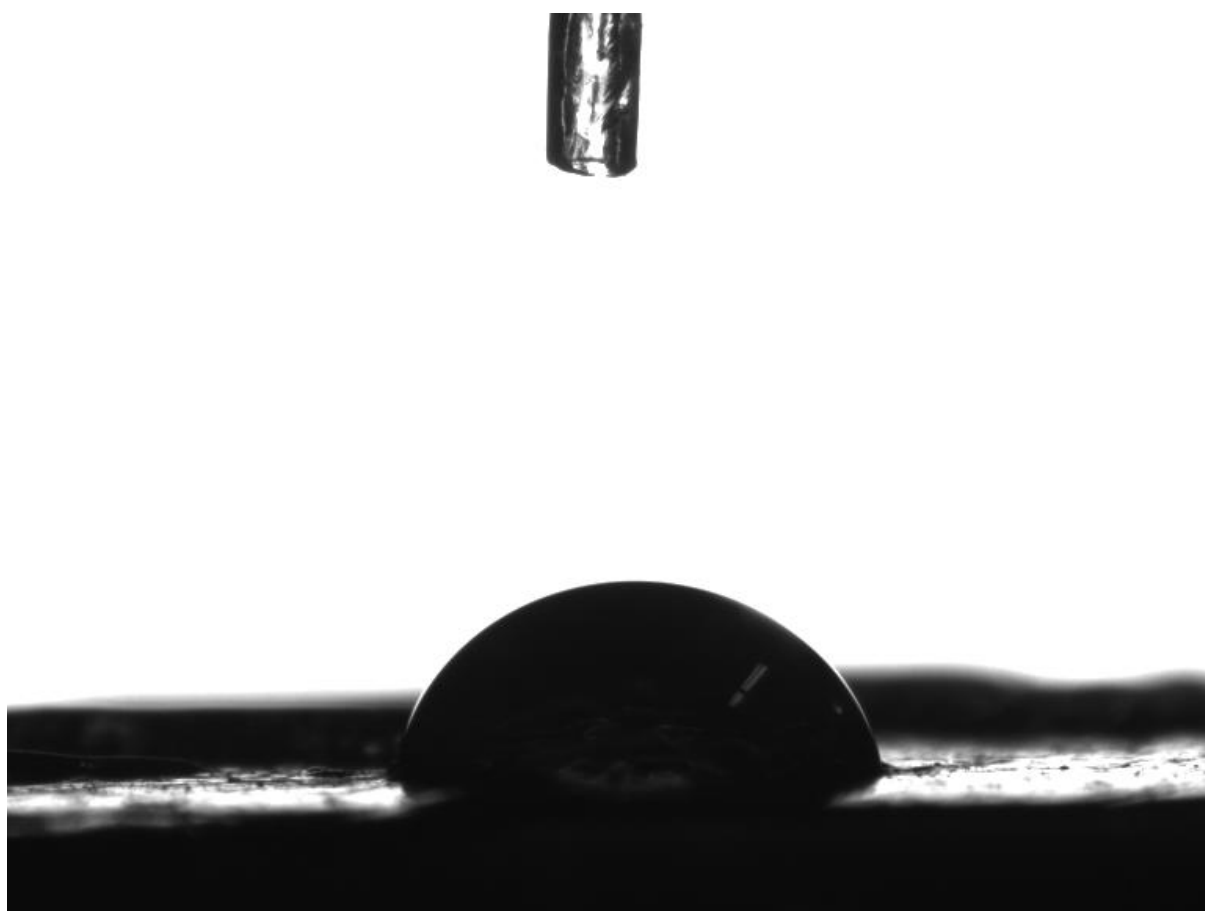

Figure S17: Water contact angle measurement of aerogel.

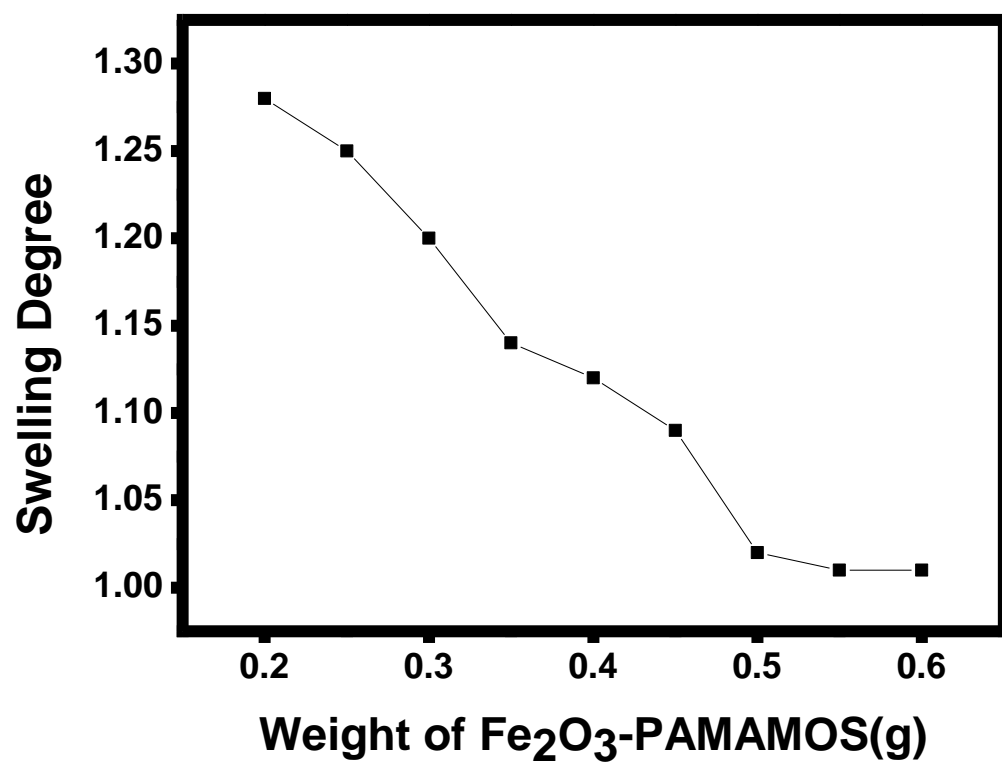

Figure S18: The swelling kinetics of the membrane versus weight of Fe<sub>2</sub>O<sub>3</sub>-PAMAMOS nanoparticles.

Table S1: Chemical stability parameter of membrane in different solvent.

| Solvent            | Stability |
|--------------------|-----------|
| Hexane             | Stable    |
| Methanol           | Stable    |
| Chloroform         | Stable    |
| Dimethyl Sulfoxide | Stable    |
| Isopropanol        | Stable    |
| Acetone            | Stable    |
| Tetrahydrofuran    | Stable    |
